# Supplementary material for: Longitudinal Associations of Dietary Sugars and Glycaemic Index with Indices of Glucose Metabolism and Body Fatness during 3-Year Weight Loss Maintenance: A PREVIEW Sub-Study
Source: MDPI journal article supplement (doi:10.3390/nu15092083), 2023-04-26
Supplement: s1 [file s1]

**Supplementary Table S2** Associations of free sugar, total sugar, and glycemic index with indices of glucose metabolism and body fatness for Nottingham intervention group (*n*= 171)

|                                      | Tertiles of free sugar |                      |                       |                           | Tertiles of total sugar |                       |                      |                           | Tertiles of glycemic index |                      |                        |                           |
|--------------------------------------|------------------------|----------------------|-----------------------|---------------------------|-------------------------|-----------------------|----------------------|---------------------------|----------------------------|----------------------|------------------------|---------------------------|
|                                      | Low (T1)               | Moderate (T2)        | High (T3)             | <i>P</i> <sub>trend</sub> | Low (T1)                | Moderate (T2)         | High (T3)            | <i>P</i> <sub>trend</sub> | Low (T1)                   | Moderate (T2)        | High (T3)              | <i>P</i> <sub>trend</sub> |
| Intake (g/d) or GI <sup>a</sup>      | 8 (5; 11)              | 19 (16; 21)          | 39 (36; 42)           |                           | 44 (42; 46)             | 70 (68; 72)           | 108 (106; 110)       |                           | 48 (47; 48)                | 55 (54; 55)          | 61 (60; 61)            |                           |
| <i>Indices of glucose metabolism</i> |                        |                      |                       |                           |                         |                       |                      |                           |                            |                      |                        |                           |
| <b>Fasting insulin (pmol/L)</b>      |                        |                      |                       |                           |                         |                       |                      |                           |                            |                      |                        |                           |
| Model A                              | 9.53<br>(8.83; 10.23)  | 9.29<br>(8.60; 9.98) | 9.41<br>(8.72; 10.11) | <b>0.032</b>              | 10.10<br>(9.31; 10.89)  | 9.28<br>(8.51; 10.05) | 9.10<br>(8.52; 9.69) | <b>0.024</b>              | 9.45<br>(8.81; 10.09)      | 8.82<br>(8.19; 9.46) | 10.46<br>(9.58; 11.33) | <b>0.005</b>              |
| Model B                              | 9.77<br>(9.09; 10.45)  | 9.23<br>(8.56; 9.89) | 9.25<br>(8.55; 9.94)  | 0.364                     | 10.11<br>(9.32; 10.89)  | 9.20<br>(8.45; 9.94)  | 9.15<br>(8.57; 9.73) | <b>0.030</b>              | 9.42<br>(8.80; 10.05)      | 8.95<br>(8.34; 9.56) | 10.28<br>(9.42; 11.13) | <b>0.015</b>              |
| <b>HbA1c (mmol/mol)</b>              |                        |                      |                       |                           |                         |                       |                      |                           |                            |                      |                        |                           |
| Model A                              | 35.2<br>(32.3; 38.1)   | 36.0<br>(33.1; 38.9) | 34.9<br>(32.0; 37.8)  | 0.196                     | 35.3<br>(34.8; 35.8)    | 36.3<br>(35.7; 36.8)  | 34.9<br>(34.5; 35.3) | <b>0.038</b>              | 35.6<br>(35.1; 36.0)       | 35.4<br>(34.9; 35.8) | 35.1<br>(34.5; 35.7)   | 0.234                     |
| Model B                              | 35.3<br>(34.9; 35.8)   | 35.9<br>(35.5; 36.4) | 34.8<br>(34.3; 35.3)  | <b>0.035</b>              | 35.2<br>(34.6; 36.1)    | 36.2<br>(35.3; 37.1)  | 35.0<br>(34.6; 36.1) | 0.130                     | 35.6<br>(35.1; 36.0)       | 35.4<br>(35.0; 35.9) | 35.0<br>(34.7; 35.6)   | 0.388                     |
| <b>Fasting glucose (mmol/L)</b>      |                        |                      |                       |                           |                         |                       |                      |                           |                            |                      |                        |                           |
| Model A                              | 5.95<br>(5.62; 6.28)   | 5.89<br>(5.57; 6.22) | 5.79<br>(5.47; 6.12)  | <b>0.006</b>              | 5.94<br>(5.86; 6.17)    | 5.92<br>(5.82; 6.12)  | 5.82<br>(5.72; 6.08) | <b>&lt;0.001</b>          | 5.90<br>(5.82; 5.98)       | 5.84<br>(5.76; 5.92) | 5.84<br>(5.74; 5.94)   | 0.377                     |
| Model B                              | 5.94<br>(5.85; 6.04)   | 5.90<br>(5.81; 5.99) | 5.79<br>(5.70; 5.88)  | <b>0.008</b>              | 5.89<br>(5.84; 6.14)    | 5.90<br>(5.75; 6.16)  | 5.86<br>(5.71; 6.11) | 0.069                     | 5.88<br>(5.80; 5.96)       | 5.85<br>(5.77; 5.92) | 5.87<br>(5.76; 5.97)   | 0.814                     |
| <b>C-peptide (pmol/L)</b>            |                        |                      |                       |                           |                         |                       |                      |                           |                            |                      |                        |                           |
| Model A                              | 751<br>(714; 789)      | 728<br>(691; 765)    | 712<br>(675; 749)     | 0.816                     | 776<br>(734; 817)       | 734<br>(694; 775)     | 703<br>(672; 734)    | <b>0.003</b>              | 761<br>(727; 795)          | 679<br>(645; 712)    | 771<br>(725; 818)      | 0.186                     |
| Model B                              | 761<br>(725; 798)      | 724<br>(689; 759)    | 706<br>(669; 743)     | 0.771                     | 774<br>(733; 817)       | 728<br>(689; 768)     | 707<br>(676; 738)    | <b>0.009</b>              | 758<br>(724; 791)          | 684<br>(652; 717)    | 767<br>(722; 812)      | 0.079                     |
| <i>Indices of Body Fatness</i>       |                        |                      |                       |                           |                         |                       |                      |                           |                            |                      |                        |                           |
| <b>Body fat (%)</b>                  |                        |                      |                       |                           |                         |                       |                      |                           |                            |                      |                        |                           |
| Model A                              | 37.1<br>(32.3; 41.8)   | 38.4<br>(33.7; 43.1) | 38.4<br>(33.7; 43.1)  | 0.018                     | 38.2<br>(33.8; 42.6)    | 38.4<br>(34.1; 42.8)  | 37.5<br>(33.3; 41.8) | 0.933                     | 37.9<br>(36.8; 39.1)       | 37.4<br>(36.2; 38.6) | 39.0<br>(37.3; 40.7)   | 0.105                     |
| Model B                              | 37.7<br>(36.4; 39.0)   | 38.3<br>(37.0; 39.6) | 37.8<br>(36.5; 39.2)  | 0.267                     | 37.6<br>(36.0; 39.1)    | 38.3<br>(36.9; 39.8)  | 37.9<br>(36.8; 39.1) | 0.190                     | 38.3<br>(37.1; 39.5)       | 37.1<br>(35.9; 38.3) | 38.7<br>(37.0; 40.4)   | 0.382                     |
| <b>BMI</b>                           |                        |                      |                       |                           |                         |                       |                      |                           |                            |                      |                        |                           |
| Model A                              | 30.0                   | 29.8                 | 30.0                  | 0.237                     | 30.4                    | 29.7                  | 29.8                 | 0.345                     | 30.1                       | 29.5                 | 30.4                   | 0.225                     |

|                                 |                |               |               |       |                |               |               |              |               |               |                |              |
|---------------------------------|----------------|---------------|---------------|-------|----------------|---------------|---------------|--------------|---------------|---------------|----------------|--------------|
|                                 | (27.7; 32.3)   | (27.5; 32.1)  | (27.7; 32.4)  |       | (28.3; 32.6)   | (27.6; 31.8)  | (27.7; 31.8)  |              | (29.5; 30.7)  | (28.9; 30.1)  | (29.6; 31.3)   |              |
| Model B                         | 30.1           | 29.7          | 30.0          | 0.282 | 30.1           | 29.6          | 30.0          | 0.411        | 30.0          | 29.4          | 30.6           | 0.085        |
|                                 | (29.4; 30.7)   | (29.1; 30.4)  | (29.3; 30.6)  |       | (29.3; 30.8)   | (28.9; 30.3)  | (29.5; 30.6)  |              | (29.4; 30.6)  | (28.8; 30.0)  | (29.8; 31.5)   |              |
| <b>Waist circumference (cm)</b> |                |               |               |       |                |               |               |              |               |               |                |              |
| Model A                         | 102.2          | 99.0          | 98.7          | 0.137 | 102.7          | 99.0          | 99.0          | <b>0.004</b> | 100.1         | 98.6          | 102.1          | 0.175        |
|                                 | (96.1; 108.3)  | (92.9; 105.1) | (92.6; 104.8) |       | (97.1; 108.3)  | (93.4; 104.6) | (93.5; 104.4) |              | (98.5; 101.7) | (97.0; 100.2) | (99.9; 104.3)  |              |
| Model B                         | 101.9          | 99.1          | 98.8          | 0.329 | 102.1          | 98.8          | 99.4          | 0.108        | 99.5          | 98.8          | 102.8          | <b>0.019</b> |
|                                 | (100.2; 103.7) | (97.4; 100.8) | (97.0; 100.6) |       | (100.1; 104.0) | (96.9; 100.7) | (97.9; 100.9) |              | (98.0; 101.1) | (97.3; 101.4) | (100.5; 105.0) |              |

Values are adjusted least-square means (95% CIs) unless otherwise indicated. Linear trends ( $P_{\text{trend}}$ ) were obtained using a linear mixed model with repeated measures. The predictors of glycemic index, dietary free sugar intake and total sugar intake were used as continuous variables. Model A adjusted for age at time of study begin and intervention center. Model B additionally adjusted for body fat percentage (only for glucose metabolism outcomes), energy intake, protein intake, fibre intake and saturated fat intake. All dietary variables were energy-adjusted. Transformations of variables for analysis:  $\log_e$  for protein intake, saturated fat intake, energy intake, BMI, HbA1c, insulin and C-peptide; square root for total and free sugar intakes. HbA1c: glycated hemoglobin A1c. BMI: body mass index. <sup>a</sup> Values are unadjusted medians (25<sup>th</sup>, 75<sup>th</sup> percentile). *P*-values stem from models with predictors as continuous variables. Bold values indicate significant findings ( $p < 0.05$ ).
