# Supplementary material for: Longitudinal Associations of Dietary Sugars and Glycaemic Index with Indices of Glucose Metabolism and Body Fatness during 3-Year Weight Loss Maintenance: A PREVIEW Sub-Study
Source: MDPI journal article supplement (doi:10.3390/nu15092083), 2023-04-26
Supplement: s1 [file s1]

## Supplementary Table S1

Characteristics of participants by study population at baseline (8 weeks) and 26 weeks (diet and lifestyle outcomes).

|                                      | Sydney + Helsinki | Nottingham        |
|--------------------------------------|-------------------|-------------------|
| <i>N</i>                             | 343               | 171               |
| <b>Females (%)</b>                   | 70.0              | 56.1              |
| <b>Age (years)</b>                   | 58 (50, 64)       | 55 (43, 63)       |
| <b>Ethnicity, (%)</b>                |                   |                   |
| <b>Caucasian</b>                     | 94.5              | 85.4              |
| <b>Asian</b>                         | 2.0               | 4.7               |
| <b>African</b>                       |                   | 9.4               |
| <b>Arabic</b>                        | 1.2               | 0.6               |
| <b>Hispanic</b>                      |                   |                   |
| <b>Other</b>                         | 2.3               |                   |
| <b>Height (m)</b>                    | 1.68 ± 0.08       | 1.67 ± 0.09       |
| <b>BW (kg)</b>                       | 82.2 (73.4, 94.0) | 84.3 (76.0, 96.1) |
| <b>BMI (kg/m<sup>2</sup>)</b>        | 29.0 (26.1, 33.1) | 29.8 (27.2, 33.6) |
| <b>FM (kg)</b>                       | 29.9 (22.9, 39.9) | 32.9 (25.9, 41.3) |
| <b>WC (cm)</b>                       | 101.6 ± 12.0      | 101.2 ± 13.0      |
| <b>Fasting insulin (pmol/L)</b>      | 7.5 (5.5, 10.1)   | 8.5 (5.9, 12.1)   |
| <b>HbA1c (mmol/mol)</b>              | 35.3 ± 3.1        | 34.8 ± 3.2        |
| <b>FPG (mmol/L)</b>                  | 5.8 ± 0.5         | 5.7 ± 0.6         |
| <b>C-peptide (pmol/L)</b>            | 690 ± 240         | 729 ± 281         |
| <b>Energy intake (kcal)</b>          | 1670 ± 394        | 1555 ± 415        |
| <b>GI</b>                            | 55.4 ± 7.1        | 53.1 ± 5.4        |
| <b>Dietary fiber (g/d)</b>           | 25.1 ± 7.8        | 21.6 ± 7.2        |
| <b>Protein (E%)</b>                  | 21.5 ± 4.8        | 20.8 ± 4.3        |
| <b>Fat (E%)</b>                      | 15.0 ± 2.9        | 13.1 ± 2.8        |
| <b>Saturated fat (E%)</b>            | 5.0 ± 1.5         | 4.3 ± 1.4         |
| <b>Carbohydrate (E%)</b>             | 39.3 ± 6.9        | 47.1 ± 8.9        |
| <b>Total sugars, g/d</b>             | 71.6 ± 24.6       | 77.5 ± 35.8       |
| <b>Total sugars, en%</b>             | 17.5 ± 4.6        | 20.1 ± 6.7        |
| <b>Added sugars<sup>^</sup>, g/d</b> | 17.5 ± 13.5       |                   |
| <b>Added sugars, en%</b>             | 4.2 ± 2.9         |                   |
| <b>Free sugars<sup>#</sup>, g/d</b>  |                   | 22.5 ± 17.3       |
| <b>Free sugars, en%</b>              |                   | 5.6 ± 3.6         |

Data are mean ± SD, median (25th, 75th percentiles), or the number of participants (%). \*Data were collected at 8 weeks. †Data were collected at 26 weeks. ^Added sugars from Sydney and Helsinki sites. #Free sugars from Nottingham site only. *BW*, body weight; *BMI*, body mass index; *FM*, fat mass; *WC*, waist circumference; *HbA1c*, glycated hemoglobin; *FPG*, fasting plasma glucose; *GI*, glycemic index
